# Supplementary material for: TOG–tubulin binding specificity promotes microtubule dynamics and mitotic spindle formation
Source: PubMed Central journal article supplement — J Cell Biol. 2017 Jun 5;216(6):1641–57. doi: 10.1083/jcb.201610090 (PMC5461023; doi:10.1083/jcb.201610090), 2017-06-05
Supplement: JCB_201610090_sm.pdf [file JCB_201610090_sm.pdf]

Byrnes and Slep, <https://doi.org/10.1083/jcb.201610090>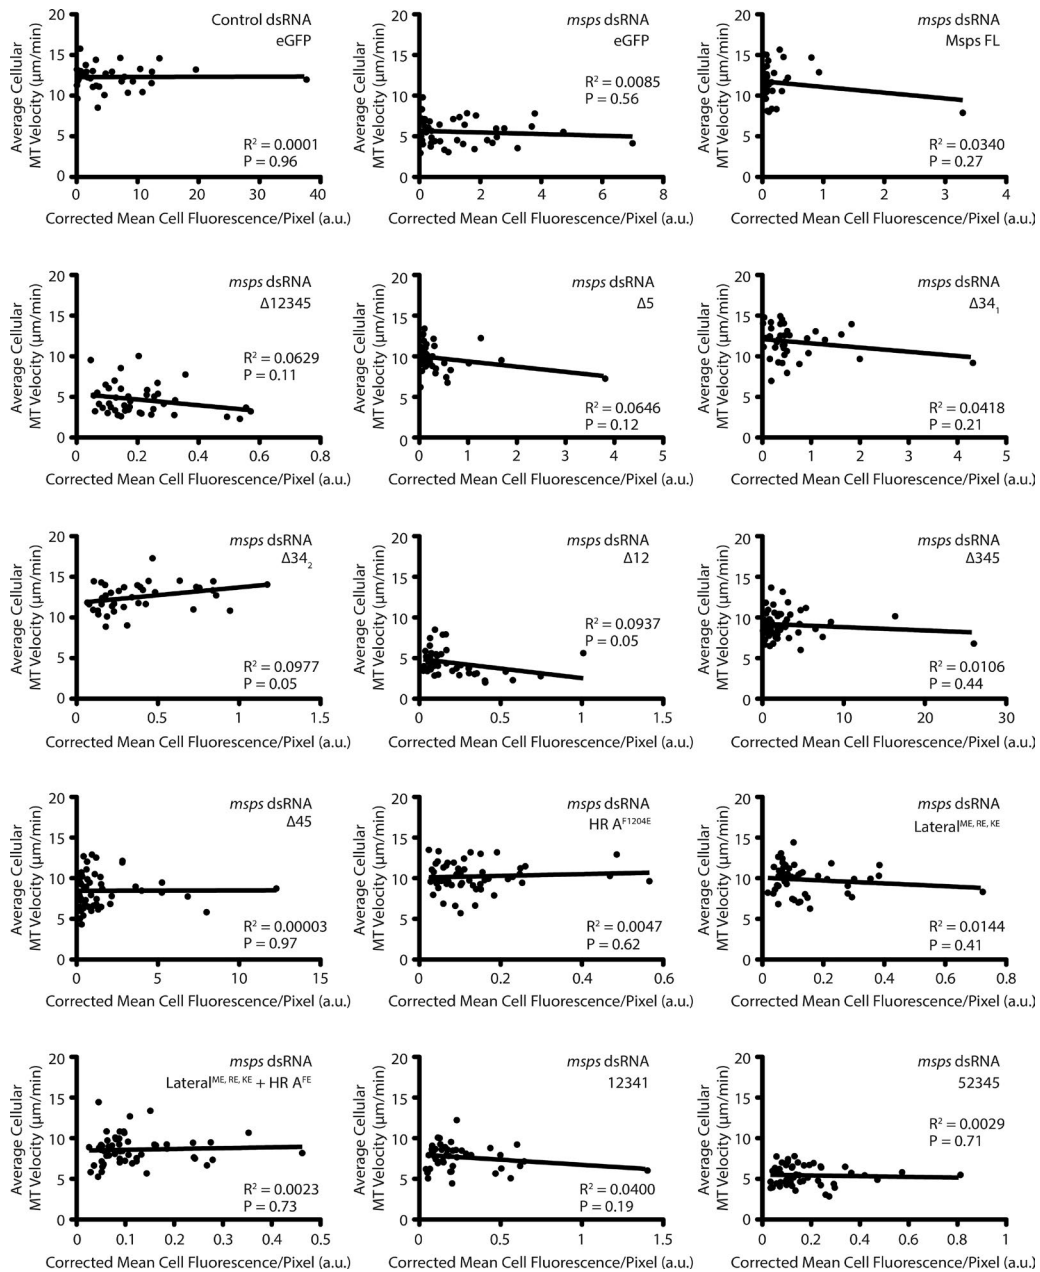

Figure S1. **MspA-eGFP construct expression does not correlate with EB1-tRFP comet velocity.** Corrected mean cell fluorescence/pixel was calculated for cells expressing eGFP and the 13 MspA-eGFP constructs used in EB1-tRFP MT polymerization rescue experiments. MspA-eGFP or eGFP (control) expression levels do not correlate with the corresponding EB1 comet velocities measured.

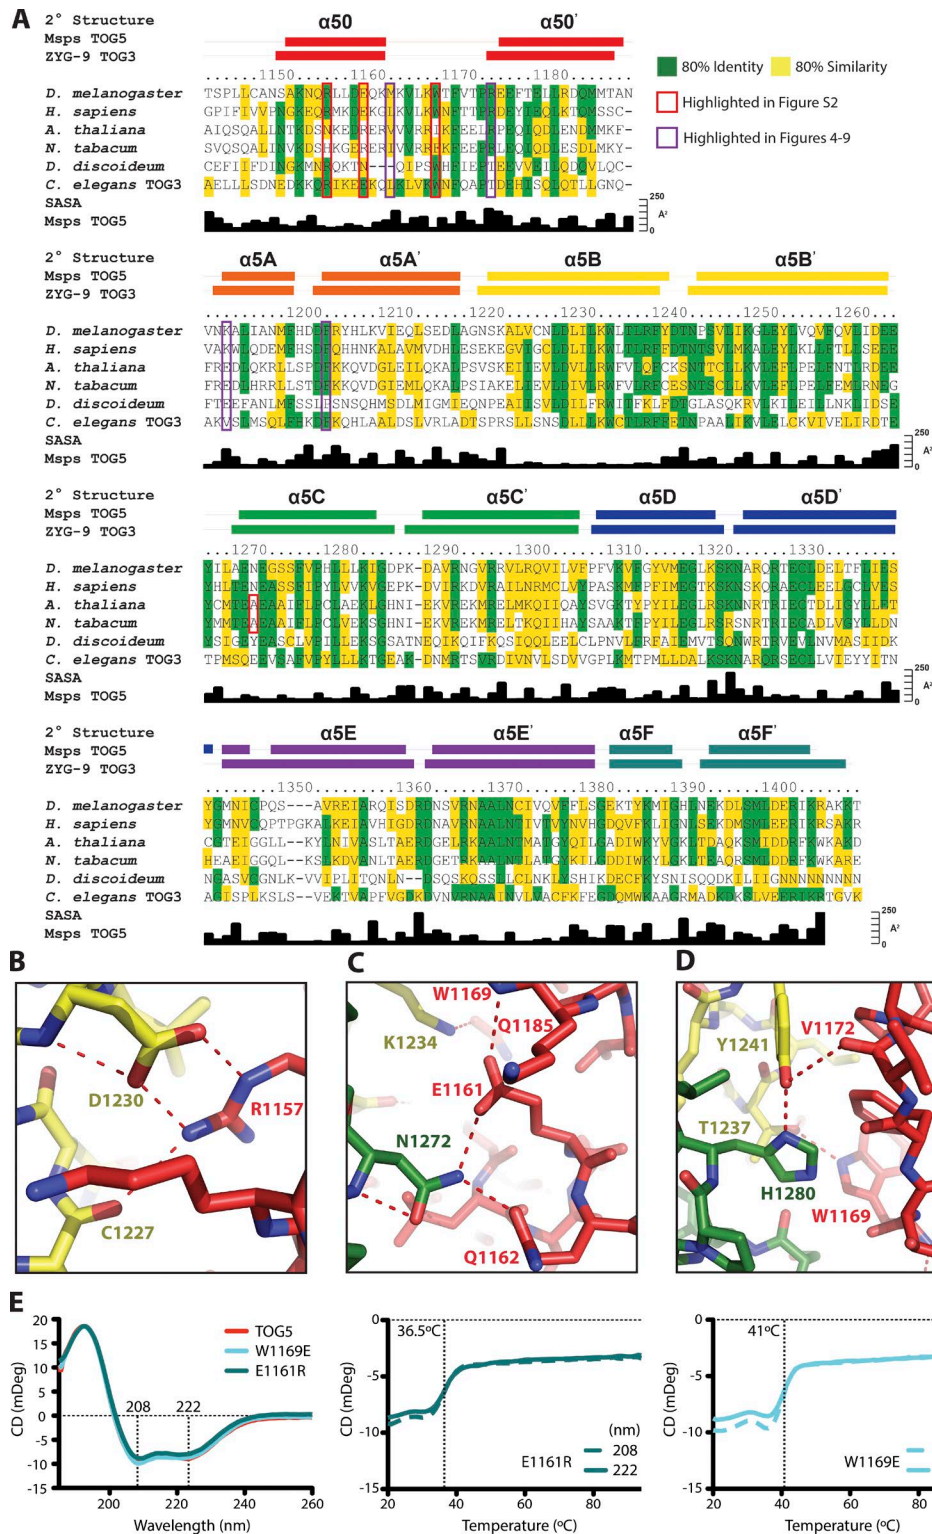

**Figure S2. TOG5 is structurally conserved and contains a stabilizing N-terminal HR.** (A) Sequence alignment of TOG5 domains and ZYG-9 TOG3. Conservation is mapped based on a multispecies alignment, with residues containing 80% identity and similarity highlighted in green and yellow, respectively. Solvent-accessible surface area and residue numbers correspond to the Msp5 TOG5 structure. Residues boxed in red and purple correspond to domain stability analyses (B–E) and HR O–A mechanistic analyses (Figs. 4–9), respectively. The secondary structures of Msp5 TOG5 and ZYG-9 TOG3 (2OF3) are presented above the alignment. (B–E) HR O makes contacts with HRs A–C that contribute to domain stability. Conserved residues including R1157 (B), E1161 (C), and W1169 (D) make contact with the body of TOG5. (E) CD spectra of native (red), E1161R (blue), and W1169E (cyan) TOG5 constructs display minima at 208 and 222 nm, consistent with  $\alpha$ -helical secondary structure. (E) CD thermal melting data indicate that mutating residues in HR O differentially affect TOG5 domain stability, although not dramatically. E1161R (middle) lowers the thermal melting of TOG5 from 42°C (Fig. S4 C) to 36.5°C, but a W1169E mutation (right) does not appreciably change TOG5 domain stability. We note that mutating R1157 completely destabilizes TOG5 and this construct cannot be purified from *E. coli*.

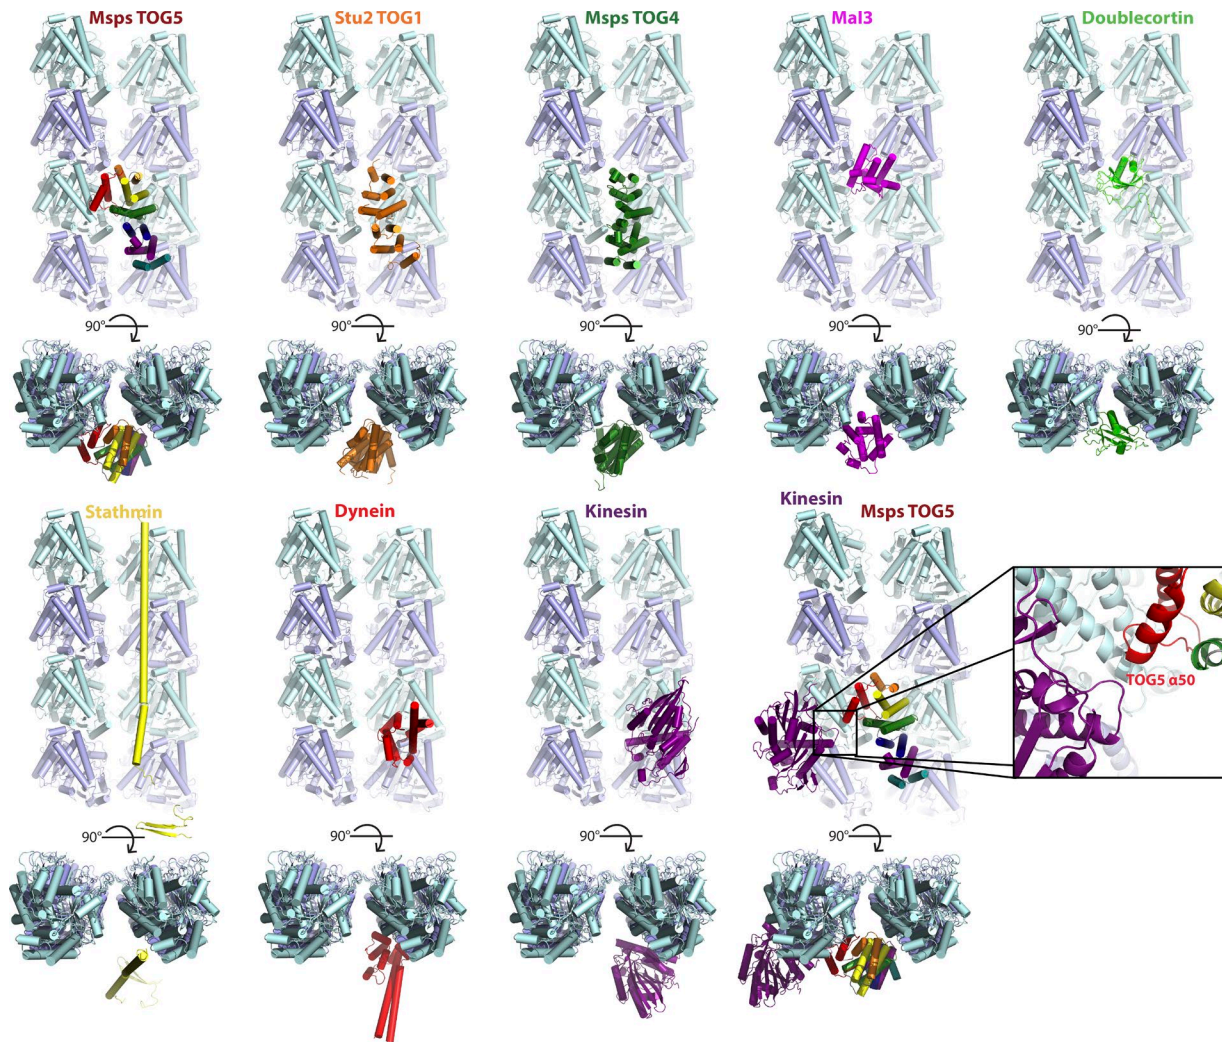

Figure S3. **MAPs contact the MT lattice in unique ways.** Using the Stu2 TOG1-tubulin (Ayaz et al., 2012; 4FFB) and Mal3-GTP $\gamma$ S-MT (Maurer et al., 2012; 4ABO) complex structures as guides, we modeled TOG domains on the MT lattice. TOGs 1–3 are not predicted to make lateral  $\alpha$ -tubulin contacts; however, TOG4 (Fox et al., 2014; 4Y5J) is positioned to make contact with lateral  $\alpha$ -tubulin. TOG5 HRs 0–A are positioned to engage  $\beta$ -tubulin and +1  $\alpha$ -tubulin on a neighboring protofilament. Other MAP–MT/tubulin complexes reveal distinct MAP–tubulin interactions that overlap, to varying degrees, with the predicted TOG–tubulin binding site. Mal3 (Maurer et al., 2012; 4ABO) and doublecortin (Liu et al., 2012; 4ATU) fenestrate between four heterodimers, positioning them to allosterically recognize tubulin’s nucleotide state and lattice curvature. The interaction of TOG5 with lateral  $\alpha$ -tubulin could inhibit Mal3 or doublecortin binding, as TOG5’s predicted MT binding site overlaps with the MT binding sites of these MAPs. The potential lateral interaction of TOGs 4 and 5 differs from those of stathmin (Nawrotek et al., 2011; 3RYF), kinesin (Cao et al., 2014; 4LNU), and dynein (Redwine et al., 2012; 3J1T), which preferentially bind tubulin heterodimers along a single protofilament. We note that when kinesin is docked on a protofilament neighboring that which TOG5 is bound to, TOG5 HR 0 (red) nicely adjoins the neighboring kinesin motor domain and may potentially enable TOG5–kinesin interactions.



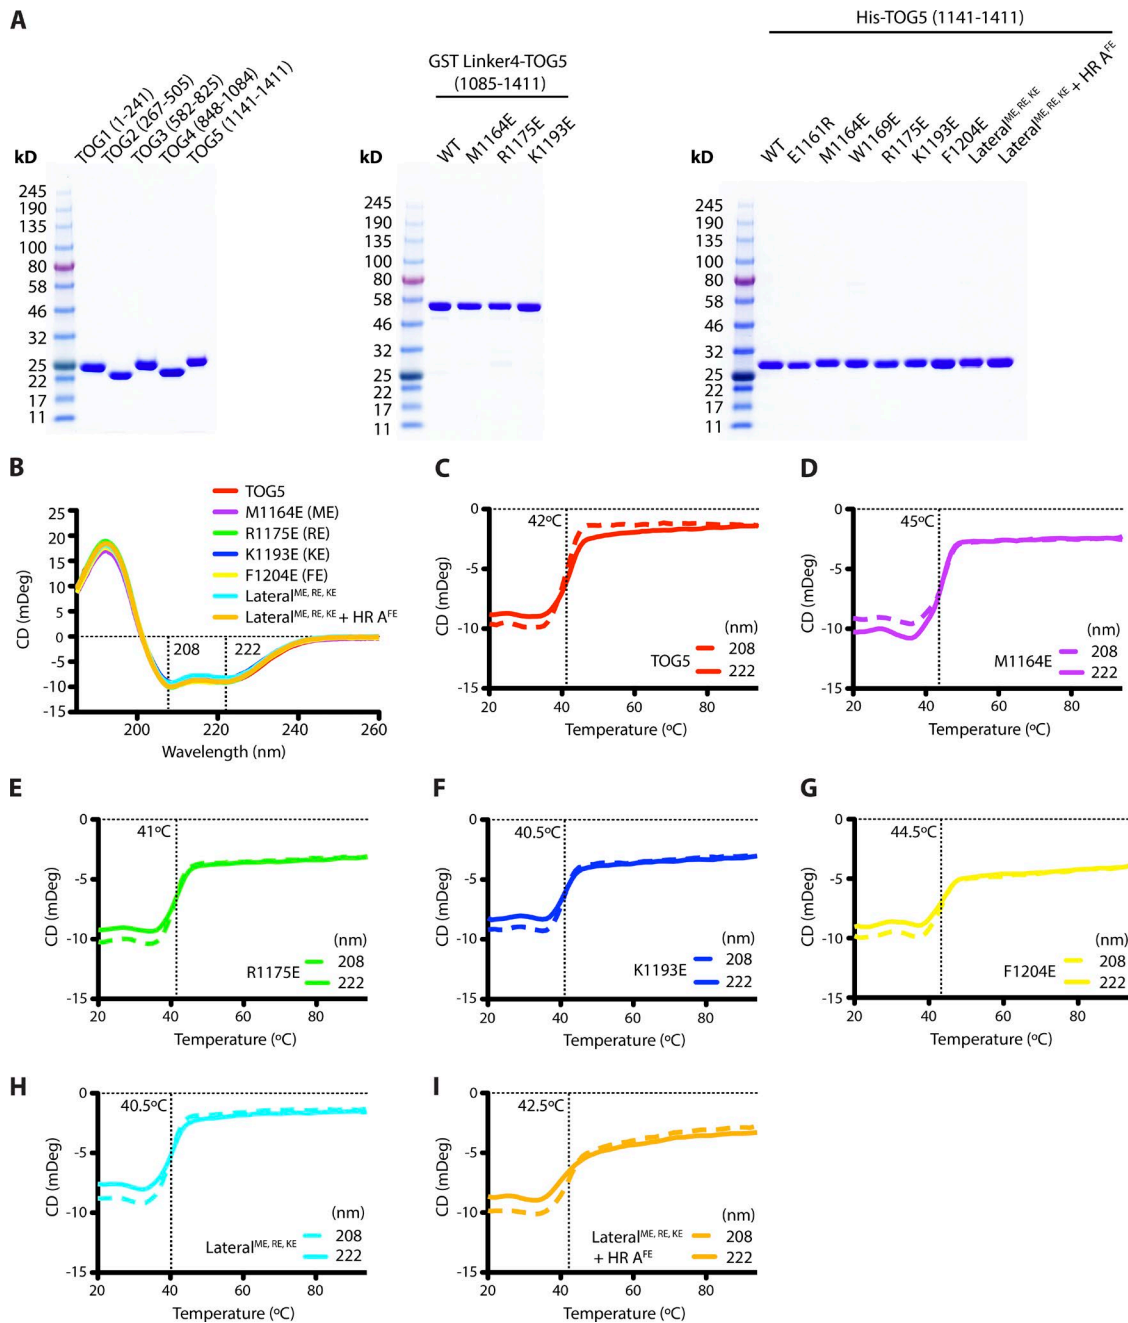

Figure S4. **Mutating TOG5-MT binding residues does not change domain secondary structure or stability.** (A) SDS gels of all purified TOG domain constructs used in this study. (B) CD spectra of native and mutant TOG5 constructs indicate  $\alpha$ -helical secondary structure at 20°C, as shown by local minima at 208 and 222 nm. (C) The CD thermal melt of native TOG5 is cooperative and has an inflection point at 42°C. (D–I) Making single or multiple point mutations in TOG5 does not dramatically change TOG5's thermal melt profile. M1164E (D), R1175E (E), K1193E (F), and F1204E (G) single point mutation constructs have thermal melt profiles that show cooperative unfolding at 45°C, 41°C, 40.5°C, and 44.5°C, respectively. Multiple mutations in HR 0 (H) or HR 0 and HR A (I) do not change TOG5 stability.

Table S1. Oligonucleotides

| Name                    | Sequence (5' to 3')                                          |
|-------------------------|--------------------------------------------------------------|
| MspI 1141 NdeI F        | GACTATCGTCATATGGATATCGACACATCGCCGCTACTGTGC                   |
| MspI 1411 XhoI R        | GACTATCGTCTCGAGCTACTAGTCTTTTTGGCTCGC                         |
| MspI 1085 BamHI F       | GACTATCGTGGATCCGTA AAAACCGCTGCCCAAAGGC                       |
| MspI 1411 NotI R        | GACTATCGTGGCGCGCTTACTTAGTCTTTTTGGCTCGC                       |
| GST GW F                | CACCATGTCCCCTATACTAGGTTATTGG                                 |
| MspI 1411 GW R          | CTTAGTCTTTTTGGCTCGCTTGTATGC                                  |
| MspI R1157E F           | GCCAACAGTGCTAAAAACCGAACTGCTAGACGAGCAAAAAATG                  |
| MspI R1157E R           | CATTTTTTGCTCGTCTAGCAGTTCCTGGTTTTAGCACTGTTGGC                 |
| MspI E1161R F           | CCAGCGGTGCTAGACCGCAAAAAATGAAGGTAC                            |
| MspI E1161R R           | GTACCTTCATTTTTTGCGGCTTAGCAGCCGCTGG                           |
| MspI M1164E F           | CTGCTAGACGAGCAAAAAGAGAGGTAATAAGTGGAC                         |
| MspI M1164E R           | GTCCACTTTAGTACCTTCTTTTTTGCTCGTCTAGCAG                        |
| MspI W1169E F           | GAAGTACTAAAGGAGACTTTTGTAAACC                                 |
| MspI W1169E R           | GGGTACAAAAGTCTCCTTTAGTACCTTC                                 |
| MspI R1175E F           | GACTTTTGTAACCCGAGAAGGAATTCACCGAAC                            |
| MspI R1175E R           | GTTCCGTGAATTCCTCTCTGGGTTACAAAAGTC                            |
| MspI K1193E F           | GACCGAAAACGTAATGAAGCACTGATAGCCAAC                            |
| MspI K1193E R           | GTTGGCTACAGTCTTCATTTACGTTTGGCGTC                             |
| MspI 5UTR dsRNA F       | GACTATCGTGTGCGACTAATACGACTCACTATAGGTGTGAGTAGCGGTACACTG       |
| MspI 5UTR dsRNA R       | GACTATCGTGGTACCTAATACGACTCACTATAGGCATCAGAATTGTGATCCAAGTACC   |
| MspI 3UTR dsRNA F       | GACTATCGTGTGCGACTAATACGACTCACTATAGGACTGTGCGCTTCCCGTAGCTA     |
| MspI 3UTR dsRNA R       | GACTATCGTGGTACCTAATACGACTCACTATAGGCATATAGTTCATGAGGATG        |
| SK dsRNA F              | GACTATCGTGTGCGACTAATACGACTCACTATAGGAAATGTAAGCGTTAATATTTTG    |
| SK dsRNA R              | GACTATCGTGGTACCTAATACGACTCACTATAGGAACAGTTGCCAGCCTGAATGG      |
| Mad2 dsRNA F            | GACTATCGTGTGCGACTAATACGACTCACTATAGGAATGGCTCTCGAAGAACATGATC   |
| Mad2 dsRNA R            | GACTATCGTGGTACCTAATACGACTCACTATAGGTTAAGTGCTCATCTTGTAGTTACC   |
| Klp61F dsRNA F          | GACTATCGTGTGCGACTAATACGACTCACTATAGGACTCTGACATTGGCATCATACC    |
| Klp61F dsRNA R          | GACTATCGTGGTACCTAATACGACTCACTATAGGTTGCGGTATTCTTGTAGC         |
| MspI Δ34 (551–1,102) F  | ACAGGGGCACGTAAGGCTTTGAAAAAATAAAAAAGTGGCGGGCGGTGGAG           |
| MspI Δ34 (551–1,102) R  | CTCCACCGCCGCGCACTGTTTTAGTTTTTCAAGACCTTACGTGCCCTGT            |
| MspI Δ34 (551–1,127) F  | ACAGGGGCACGTAAGGCTTTGAAAAAAGGACAAGCAAGCAGGTACCAGCCG          |
| MspI Δ34 (551–1,127) R  | GCGCTGGTACCTGCTTGTCTTCTTTTTCAAGACCTTACGTGCCCTGT              |
| MspI Δ5 (1,141–1,411) F | CAGGTACCAGCGCGCAAAAAGGACGAAAAGCCACGCCACCGCCATCTGTTGAT        |
| MspI Δ5 (1,141–1,411) R | ATCAACAGATGGCGGTGGCGTGGCTTTTCTGCTTTTTGCGCGCTGGTACCTG         |
| MspI Δ12345 (1–1,411) F | AAGCAGGCTCCGCGCGCCCTTACCCCAAGAAGGAGACACGACCTGCATCTGC         |
| MspI Δ12345 (1–1,411) R | ATCAACAGATGGCGGTGGCGTGGCTTGGTGAAGGGGCGCGCGGAGCCTGCTT         |
| MspI Δ12 (1–505) F      | AAGCAGGCTCCGCGCGCCCTTACCCCAAGAAGGAGACACGACCTGCATCTGC         |
| MspI Δ12 (1–505) R      | GCAGATGCAGGTCGTCTCTCTTTTGGGGTGAAGGGGCGCGCGGAGCCTGCTT         |
| MspI Δ345 (582–1,411) F | CCTAGCCACGGAACGGAATAACCAAGCCACGCCACCGCCATCTGTTGATGTC         |
| MspI Δ345 (582–1,411) R | GCACATCAACAGATGGCGGTGGCGTGGCTTGGTATTTCCGCTTCCGTTGCTAGG       |
| MspI Δ45 (848–1,411) F  | AGCCGGAAGAAGGAGCCCATTAATAAGCCACGCCACCGCCATCTGTTG             |
| MspI Δ45 (848–1,411) R  | CAACAGATGGCGGTGGCGTGGCTTATTAATGGCTCCTCTTCCGGCT               |
| MspI 12341 Vector F     | AAGCCACGCCACCGCCATCTGTTGAT                                   |
| MspI 12341 Vector R     | TTCCGCTTTTTTGGCGCTGGTACCTG                                   |
| MspI 12341 TOG1 F       | CAGGTACCAGCGCGCAAAAAGGACGAAGGTACAAGAAGTTGCCGGT               |
| MspI 12341 TOG1 R       | ATCAACAGATGGCGGTGGCGTGGCTTGGACTTTAGATATCTGGAGGGTTC           |
| MspI 52345 Vector F     | CAGCAGAAAAGCAAGCAAGATCGCCGATGCTGC                            |
| MspI 52345 Vector R     | TGTGTCCTCGCCATGGTGAAGGGGGCGG                                 |
| MspI 52345 TOG5 F       | CCGCCCCCTTACCATGGCCGAGGACACAGATATCGACACATCGCCGCTACTG         |
| MspI 52345 TOG5 R       | GCAGCATCGCGCATCTTCGCTTGTCTTTCTGTGCTTAGTCTTTTTGGCTCGCTTGTATGC |

F, forward; GW, gateway; R, reverse.

## References

- Ayaz, P., X. Ye, P. Huddleston, C.A. Brautigam, and L.M. Rice. 2012. A TOG:αβ-tubulin complex structure reveals conformation-based mechanisms for a microtubule polymerase. *Science*. 337:857–860. <http://dx.doi.org/10.1126/science.1221698>
- Cao, L., W. Wang, Q. Jiang, C. Wang, M. Knossow, and B. Gigant. 2014. The structure of apo-kinesin bound to tubulin links the nucleotide cycle to movement. *Nat. Commun.* 5:5364. <http://dx.doi.org/10.1038/ncomms5364>
- Fox, J.C., A.E. Howard, J.D. Currie, S.L. Rogers, and K.C. Slep. 2014. The XMAP215 family drives microtubule polymerization using a structurally diverse TOG array. *Mol. Biol. Cell*. 25:2375–2392. <http://dx.doi.org/10.1091/mbc.E13-08-0501>
- Liu, J.S., C.R. Schubert, X. Fu, F.J. Fourniol, J.K. Jaiswal, A. Houdusse, C.M. Stultz, C.A. Moores, and C.A. Walsh. 2012. Molecular basis for specific regulation of neuronal kinesin-3 motors by doublecortin family proteins. *Mol. Cell*. 47:707–721. <http://dx.doi.org/10.1016/j.molcel.2012.06.025>

- Maurer, S.P., F.J.ourniol, G. Bohner, C.A. Moores, and T. Surrey. 2012. EBs recognize a nucleotide-dependent structural cap at growing microtubule ends. *Cell*. 149:371–382. <http://dx.doi.org/10.1016/j.cell.2012.02.049>
- Nawrotek, A., M. Knossow, and B. Gigant. 2011. The determinants that govern microtubule assembly from the atomic structure of GTP-tubulin. *J. Mol. Biol.* 412:35–42. <http://dx.doi.org/10.1016/j.jmb.2011.07.029>
- Redwine, W.B., R. Hernández-López, S. Zou, J. Huang, S.L. Reck-Peterson, and A.E. Leschziner. 2012. Structural basis for microtubule binding and release by dynein. *Science*. 337:1532–1536. <http://dx.doi.org/10.1126/science.1224151>
